1 *Title*

2 **Copepod functional traits and groups show divergent biogeographies in the global ocean**

3

4 *Running title*

5 Global marine copepod traits biogeography

6

7 *Authors*

8 Fabio Benedetti<sup>1\*</sup> (0000-0002-7554-3646)

9 Jonas Wydler<sup>1</sup>

10 Meike Vogt<sup>1</sup> (0000-0002-0608-1935)

11

12 <sup>1</sup>Environmental Physics, Institute of Biogeochemistry and Pollutant Dynamics, ETH Zürich, 8092  
13 Zürich, Switzerland.

14 \*Corresponding author: [fabio.benedetti@usys.ethz.ch](mailto:fabio.benedetti@usys.ethz.ch)

15

16 *Acknowledgements*

17 This project has received funding from the European Union's Horizon 2020 research and  
18 innovation program under grant agreement No. 862923. This output reflects only the author's  
19 view and the European Union cannot be held responsible for any use that may be made of the  
20 information contained therein. We thank all contributors involved in the plankton species  
21 field sampling and identification throughout the world and we acknowledge the efforts made  
22 to deposit the data on publicly available online archives. We thank Luke Gregor for editing  
23 the language of an early version of the manuscript. We thank Dr. Maria Grazia Mazzocchi  
24 and an anonymous reviewer for their constructive comments. No permits were needed to  
25 carry out the present study.

26

27 *Conflict of interest*

28 The authors declare no conflict of interests.

29

30 *Abstract*

31 **Aim:** The distribution of zooplankton functional traits is a key factor for regulating food web  
32 dynamics and carbon cycling in the oceans. Yet, we lack a clear understanding of how many  
33 functional groups (FGs) exist in the zooplankton and how their traits are distributed on a  
34 global scale. Here, we model and map the environmental habitats of copepod (i.e. the main  
35 component of marine zooplankton) FGs to identify regions sharing similar functional trait  
36 expression, at the community level.

37 **Taxon:** Marine planktonic Neocopepoda.

38 **Location:** Global ocean.

39 **Methods:** Factor analysis on mixed data and hierarchical clustering were used to identify  
40 copepod FGs based on five species-level functional traits. An ensemble of species distribution  
41 models was used to estimate the environmental niches of the species modelled and the  
42 community weighted mean values of the traits studied. Ocean regions were defined based on  
43 their community-level mean trait expression using a principal component analysis and  
44 hierarchical clustering.

45 **Results:** Eleven global copepod FGs were identified. They displayed contrasting latitudinal  
46 patterns in mean annual habitat suitability that could be explained by differences in  
47 environmental niche preferences: two FGs were associated with polar conditions, one  
48 followed the global temperature gradient, five were associated with tropical oligotrophic  
49 gyres, and the remaining three with boundary currents and counter currents. Four main  
50 regions of varying community weighted mean trait values emerged: the Southern Ocean, the  
51 northern and southern high latitudes, the tropical gyres, and the boundary currents and  
52 upwelling systems.

53 **Conclusions:** The present FGs will improve the representation of copepods in global marine  
54 ecosystem models. This study improves the understanding of the patterns and drivers of  
55 copepods trait biogeography and will serve as a basis for studying links between zooplankton  
56 biodiversity and ecosystem functioning in a context of climate change.

57

58 *Keywords*

59 Community weighted mean trait, Functional groups, Global Ocean, Marine copepods, Species  
60 Distribution Models, Trait-based approach, Zooplankton

61

## 62        **1. Introduction**

63        Copepods are crustaceans that dominate the biomass of the mesozooplankton (0.2-2.0 mm)  
64        and rank amongst the most abundant animals in the oceans (Huys & Boxshall, 1991). They  
65        are morphologically and functionally diverse and adapted to all aquatic ecosystems, with  
66        particular success in marine systems (Huys & Boxshall, 1991; Kiørboe, 2011a). Copepods  
67        play a pivotal role in food webs, both as microplankton grazers and prey for higher trophic  
68        levels (Beaugrand, Edwards, & Legendre, 2010). Copepods also play a critical role in the  
69        marine biological carbon pump by performing extensive vertical migrations, grazing on  
70        phytoplankton in the sunlight layers and releasing relatively fast-sinking fecal pellets,  
71        exporting organic carbon with dead carcasses down to the deep layers (Turner, 2015;  
72        Steinberg & Landry, 2017).

73        The relative contribution of planktonic copepods to the above-mentioned processes is  
74        mediated by their diversity and trait expression (Barton et al., 2013). For instance, larger  
75        copepods perform stronger diel vertical migrations and produce larger fecal pellets that sink  
76        faster and thus increase the proportion of carbon exported to depth (Stamieszkin et al., 2015;  
77        Ohman & Romagnan, 2016). The dominance of certain copepod feeding modes impacts food-  
78        web dynamics as feeding modes affect grazing and mortality rates (Kenitz, Visser, Mariani, &  
79        Andersen, 2017; van Someren Gréve, Almeda, & Kiørboe, 2017). Yet, mechanistic ecosystem  
80        models usually represent zooplankton only through a few size classes (Le Quéré et al., 2005),  
81        which oversimplifies the contribution of species and functional diversity to ecosystem  
82        functioning and biogeochemical cycles (Flynn et al., 2015). Multiple studies show that the  
83        number and grazing characteristics of zooplankton functional groups (FGs) control the  
84        biomass and diversity of other functional groups, with consequences for global  
85        biogeochemical cycles (Prowe et al., 2012; Sailley et al., 2013; Vallina et al., 2014; Le Quéré  
86        et al., 2016). Ecosystem models rely strongly on parameterisations of traits governing  
87        biological processes and food-web interactions based on scarce empirical evidence (Barton et  
88        al., 2013). Consequently, investigating the potential links between copepod trait distribution  
89        and ecosystem functioning contributes to improving these models (Stocker, 2014).

90        To better represent the role of zooplankton in marine systems, ecologists are increasingly  
91        adopting trait-based approaches (Litchman, Ohman, & Kiørboe, 2013; Hébert, Beisner, &  
92        Maranger, 2017). Functional traits are species- or organism-level characteristics that affect  
93        their fitness and are linked to survival, feeding, growth, and reproduction (Violle et al., 2007;  
94        Litchman et al. 2013). Due to trade-offs between them, organisms cannot maximize all  
95        functions at the same time. For example, copepods that rely on active ambush feeding (i.e.,

96 copepods that only move to capture prey) show 8.5 times lower mortality rates than copepods  
97 that rely on active feeding strategies (van Someren Gréve, Almeda, & Kiørboe, 2017). Yet,  
98 adult male copepods need to move actively to find a mate for reproduction, which undermines  
99 the benefits of their feeding mode (Kiørboe, 2011b; Litchman et al., 2013).

100 Copepod traits dynamics can be investigated by grouping species into FGs with similar trait  
101 combinations (Benedetti, Gasparini, & Ayata, 2016; Becker et al., 2021). Categorizing  
102 species according to their similarity in functional traits rather than their taxonomic  
103 classification enables to summarize their diversity into distinct, parsimonious groups. At the  
104 regional scale, Pomerleau et al. (2015) showed that 42 zooplankton species in the North East  
105 Pacific Ocean could be clustered into five groups based on their body length, feeding and  
106 reproduction mode, and trophic group. Similarly, Benedetti, Vogt et al. (2018) grouped  
107 dominant Mediterranean copepod species into seven FGs with distinct environmental niche  
108 characteristics. Such groupings can improve the representation of zooplankton in ecosystem  
109 models since FGs increase the representation of ecological function without adding  
110 taxonomic diversity and complexity.

111 The functional composition of zooplankton can be examined using functional diversity  
112 indices which indicate how changes in species richness and composition affect the emergent  
113 expression of traits (Villéger, Mason & Mouillot, 2008). These indices allow to investigate  
114 biodiversity and ecosystem functioning relationships as they indicate changes in ecological  
115 processes that drive community assembly. For instance, Becker et al. (2021) documented a  
116 poleward decrease in copepod functional diversity in the South Atlantic, which was driven by  
117 the decreasing contribution of cruising carnivores and small and medium-sized broadcasting  
118 copepods. The authors attributed this poleward decrease in functional diversity to niche  
119 partitioning as only a subset of functionally very dissimilar groups of copepods thrived in the  
120 cold and productive waters of the Southern Ocean.

121 The functional composition of zooplankton can also be investigated through community  
122 weighted mean (CWM) values of traits (Ricotta, 2005; Brun et al., 2016), i.e. the proportion  
123 of species in a community that exhibits a particular trait value weighed by their relative  
124 contribution to community composition. Thereby, CWM values of functional traits help to  
125 identify the relationships between the emerging expression of functional traits on a  
126 community-level, the environmental drivers of their biogeographical patterns of trait  
127 expression, and the potential trade-offs underlying trait expression. The first truly global study  
128 by Brun et al. (2016) found larger copepod body sizes, higher proportions of myelinated  
129 species, and relatively smaller clutch size at latitudes  $>50^\circ$ , associated with gradients in

130 temperature and phytoplankton seasonality. To our knowledge, other qualitative traits such as  
131 trophic group or spawning mode have been investigated but not using a global CWM trait  
132 approach (McGinty et al., 2018; Benedetti, Vogt et al., 2018). If patterns of CWM values are  
133 clustered in space and time, they can be used to define ocean regions sharing common  
134 ecological characteristics (Longhurst, 2010; Reygondeau et al., 2017; Hofmann Elizondo et  
135 al., 2021). Although new data compilations make it possible, neither copepod FGs nor CMW-  
136 based regionalization schemes have been investigated on a global scale, yet this could be  
137 highly informative of large-scale marine food web and ecosystem dynamics.

138 Here, we use hierarchical clustering and a state-of-the-art species distribution models (SDMs)  
139 framework to address the following questions: (i) What are the global copepod FGs emerging  
140 from the clustering of the functional traits of commonly sampled copepod species? (ii) Do  
141 copepod FGs show different environmental niche preferences (i.e. niche centers and widths)?  
142 (iii) What are the habitat distribution patterns of these FGs and their community-level trait  
143 expression, and which regions of the global ocean share similar trait expression?

144

## 145 **2. Materials and Methods**

146 Figure 1 summarizes the analytical framework we developed to identify emergent copepod  
147 FGs and their habitats in the global ocean using an ensemble species distribution model  
148 (SDMs) approach.

149

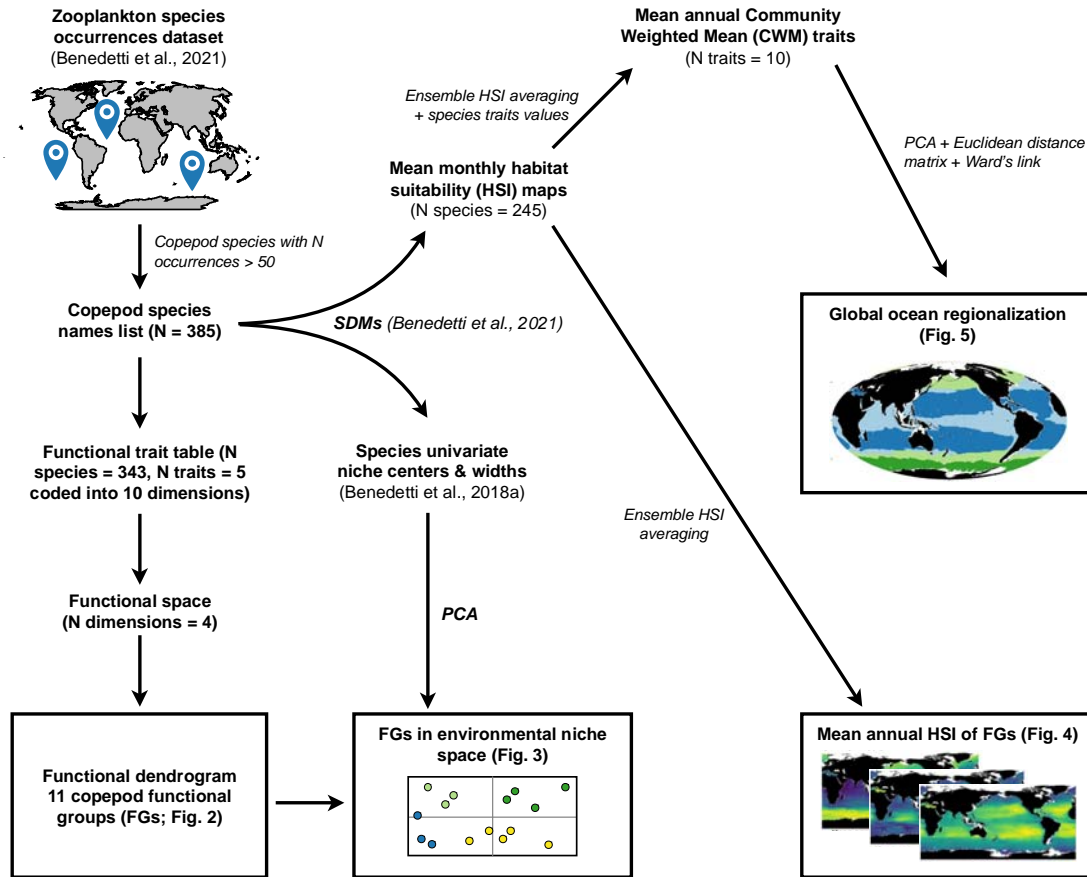

150

151 *Figure 1: Flowchart summarizing the numerical analyses implemented in our study. SDMs =*  
 152 *Species distribution models, PCA = Principal component analysis.*

153

## 154 2.1. Species occurrence data

155 We used the zooplankton occurrences dataset (geolocated and dated presences) compiled by  
 156 Benedetti et al. (2021). Occurrences corresponding to benthic and parasitic copepods,  
 157 occurrences with missing spatial coordinates, sampling dates, sampling depth, or not  
 158 identified at species-level were removed. Data from drilling holes, grid cells within 25 km of  
 159 the nearest shoreline, or with a maximum sampling depth >500 m were also discarded (see  
 160 Benedetti et al., 2021). To address sampling effort biases in the copepod occurrence data  
 161 (Appendix S1) that could inflate models performance metrics or over-represent portions of the  
 162 environmental space and thus hinder model predictability and interpretation (Veloz, 2009;  
 163 Hijmans, 2012), we thinned occurrences using a randomization algorithm for each month and  
 164 each species (30 randomizations per species dataset) so that monthly species occurrences  
 165 were at least 500 km apart (Aiello-Lammens, Boria, Radosavljevic, Vilela, & Anderson,

166 2015). Only those 385 species displaying at least 50 occurrences were retained to constitute  
167 the list of species for which functional traits data were retrieved (Appendix S2).

168

## 169 2.2. Species functional trait data

170 Five functional traits were included based on data availability from the literature (Appendices  
171 S2 and S3):

172 Body size (quantitative continuous): mean maximum adult female body size (i.e. length of the  
173 cephalothorax) in mm. Body size is considered a master trait as it impacts all life functions,  
174 scales with most physiological rates and influences predator-prey interactions (Hansen,  
175 Bjornsen, & Hansen, 1994; Kiørboe & Hirst, 2014; Hébert, Beisner, & Maranger, 2017). The  
176 mean maximum body size values used here were derived from Razouls et al. (2015) and range  
177 from 0.46 to 11.00 mm.

178 Trophic group (categorical): most marine planktonic copepods are omnivorous but they can  
179 be grouped according to their primary food source to describe their role in food-web  
180 dynamics (Pomerleau et al., 2015; Benedetti et al., 2016). Here, the following five groups  
181 were defined: Omnivore-Herbivore, Omnivore-Carnivore, Omnivore-Detritivore, strict  
182 Carnivore, and Omnivore.

183 Feeding mode (categorical): copepods rely on various strategies to detect and capture their  
184 prey. We follow the definitions of Kiørboe (2011a): ambush-feeding, current-feeding, cruise-  
185 feeding, particle-feeding, current-cruise feeding, and current-ambush feeding (the last two  
186 refer to mixed-feeding species with both strategies). Ambush-feeding copepods lurk in the  
187 water column, detect the vibration generated by motile preys and capture them through quick  
188 jumps. Current-feeding species use a scanning current to detect and capture immobile preys  
189 like phytoplankton cells (Kiørboe, 2011a). Cruise-feeders are copepods that swim actively  
190 through the water column in search of their prey. Lastly, particle-feeders are species known to  
191 live on aggregates of sinking organic particles such as discarded appendicularians' houses.

192 Myelination (binary): myelinated copepod species have a lipid-rich myelin sheath around  
193 their nerves that enables faster attack or evasive reactions (Lenz, 2012). Myelin sheaths play a  
194 key role in modulating mortality and feeding rates and improve energy savings at low food  
195 conditions.

196 Spawning mode (binary): eggs are either released into the open water after fertilization (free-  
197 spawning) or are carried by females in egg sacs or in egg masses (sac-spawning). Sac  
198 spawning copepods display lower fecundity rates and longer hatching times (Kiørboe &  
199 Sabatini, 1994).

200

### 201 2.3. Definition of functional groups

202 Only those copepod species with a body size value and no missing data for three out of the  
203 five traits were retained ( $n = 343$ ). The species' trophic groups and feeding modes were re-  
204 coded binarily to accurately represent species that belong to several feeding modes/ trophic  
205 groups (Appendix S2). Thus, the analyses described below were performed on 343 species  
206 based on ten functional trait dimensions.

207 A factor analysis on mixed data (FAMD; Pagès, 2004) that summarize the main modes of trait  
208 combinations was used to estimate the functional distances between species. The use of a  
209 FAMD is an improvement to the Multiple Correspondence Analysis used in Benedetti et al.  
210 (2016) as it allowed to retain body size as a quantitative continuous variable. Four FAMD  
211 components explaining 80.15% of the variance in species traits were retained (Audigier et al.,  
212 2016). A Euclidean distance matrix was computed from the species' score along the four  
213 FAMD components, and Ward's agglomeration link was used to generate a functional  
214 dendrogram. The number FGs was determined by the height at which the dendrogram is cut.  
215 We investigated the sensitivity of the resulting FGs to the main parameters of our clustering  
216 approach (Appendix S4) and inspected each dendrogram to ensure the ecological relevance of  
217 the final FGs (i.e., avoid few large groups that are functionally heterogenous or numerous  
218 small groups that are functionally redundant). Ultimately, eleven FGs were identified (Table  
219 S4.2).

220

### 221 2.4. Species distribution modelling

#### 222 2.4.1. Environmental predictor selection

223 We considered 14 commonly used environmental drivers of the spatial ranges of marine  
224 copepod species (see Appendix S5; Benedetti et al., 2021). The monthly climatologies of all  
225 predictor variables were projected onto the  $1^\circ \times 1^\circ$  cell grid of the World Ocean Atlas (WOA;  
226 Boyer et al., 2013) and matched with the species occurrence data.

227 We used a two-stage procedure to select environmental predictors. First, we removed  
228 collinear predictors (mean Spearman rank correlation coefficient  $> |0.7|$ ) to avoid increasing  
229 the uncertainty in regression model projections through coefficient inflation (Dormann et al.,  
230 2013). This first step retained the following ten predictors: sea surface temperature (SST,  $^\circ\text{C}$ ),  
231 photosynthetically active radiation (PAR,  $\mu\text{mol m}^{-2} \text{s}^{-1}$ ), logged nitrate concentration ( $\log\text{NO}_3$ ,  
232  $\mu\text{M}$ ), mixed layer depth (MLD, m), logged chlorophyll a concentration ( $\log\text{Chla}$ ,  $\text{mg m}^{-3}$ ),  
233 logged eddy kinetic energy ( $\log\text{EKE}$ ,  $\text{m}^2 \text{s}^{-2}$ ), surface wind speed (Wind,  $\text{m s}^{-1}$ ), surface



234 carbon dioxide partial pressure ( $p\text{CO}_2$ ,  $\mu\text{atm}$ ), the excess of silicates to nitrates ( $\text{Si}^* = [\text{SiO}_2] -$   
235  $[\text{NO}_3^-]$ ,  $\mu\text{M}$ ) and the excess of nitrate over phosphate ( $\text{N}^* = [\text{NO}_3] - 16[\text{PO}_4^{3-}]$ ,  $\mu\text{M}$ ).

236 Second, the number of environmental predictors included in the SDMs was restricted to five  
237 to achieve a 10:1 ratio of occurrences to predictors (Guisan et al., 2017). For each species and  
238 SDM, one of the ten predictors was randomly reshuffled prior to training a model ( $n = 30$   
239 repetitions). The correlation coefficients between the predictions of the original dataset and  
240 those of the reshuffled datasets were used to estimate the relative ranking of each predictor  
241 (Appendix S6). We used the top five predictors for each FG and SDM separately to train the  
242 SDMs and project the species' habitat suitability (Appendix S6).

243

#### 244 2.4.2. Background data, model configuration and habitat suitability projections

245 Pseudo-absence data were generated to use correlative SDMs following the target-group  
246 approach of Phillips et al. (2009) which is appropriate to model plankton groups with sparse  
247 data (Righetti et al., 2019; Benedetti et al., 2021). We chose to randomly draw pseudo-  
248 absences from the total pool of sites (i.e., monthly  $1^\circ \times 1^\circ$  grid cells) with at least ten  
249 occurrences across all species, except for FG2, FG4 and FG11 which showed sampling efforts  
250 that were distinct from the other groups (Appendices S1 and S4). For species of FG2, FG4  
251 and FG11, pseudo-absences were randomly drawn only from those sites where at least 10  
252 different species of their FG were found. Ten times more background data than presences  
253 were generated and presences were weighted ten times more than pseudo-absences (Barbet-  
254 Massin et al., 2012).

255 We developed an ensemble modelling approach that combined three SDMs types which were  
256 configured to avoid model overfitting (Merow et al., 2014; Thuiller et al., 2020): Generalized  
257 Additive Models (GAMs), Generalized Linear Models (GLMs), and Artificial Neural  
258 Networks (ANNs). The GLM were run using a quadratic formula and a logit link function.  
259 The GAMs were set up to use a logit link function and a maximum of five smoothing terms.  
260 ANNs were run using five cross validations with 200 iterations to optimize number of unities  
261 in the hidden layer and the parameter for weight decay. The SDMs were trained on 80% of  
262 the presence/pseudo-absence data chosen at random and tested on the remaining 20%. Ten  
263 random cross evaluations were carried out and the true skill statistic (TSS) was calculated to  
264 evaluate model performance. Only species displaying a mean TSS score  $>0.30$  were used for  
265 the final species and functional trait projections. The SDMs were then projected onto the  
266 monthly environmental predictor conditions of the global ocean to obtain species-level maps

267 of habitat suitability indices (HSI). For each FG, annual mean HSI values were obtained by  
268 averaging the monthly HSI maps across each species constituting the FG and SDMs.

269

## 270 2.5. Positioning FGs in environmental niche space

271 The mean univariate response curves emerging from GAMs were used to estimate the relative  
272 optimal conditions (i.e., niche center) and tolerance (i.e., niche width) for each species and  
273 predictor (Appendix S7; Benedetti, Vogt et al., 2018). The niche center was calculated as the  
274 HSI-weighted median and the niche width as the difference between the weighted 10<sup>th</sup> and  
275 90<sup>th</sup> percentiles. For this analysis, a set of eight predictors common to all species was defined  
276 based on the overall ranking of predictors (i.e., unlike the top five FG-specific predictors used  
277 for global SDMs projections; Appendix S6): SST, logChl, logNO<sub>3</sub>, MLD, Si<sup>\*</sup>, PAR, N<sup>\*</sup> and  
278 logEKE. We do this because a principal component analysis (PCA; Legendre & Legendre,  
279 2012) was then performed on the niche centers and niche widths of all eight common  
280 predictors to ordinate the species in an environmental “niche space”. Non-parametric variance  
281 analyses (Kruskal-Wallis tests and post-hoc Dunn’s test) were carried out to test if FGs differ  
282 in their position in niche space.

283

## 284 2.6. Community weighted median (CWM) proportions of traits

285 To explore the biogeography of all copepod traits, the monthly CWM trait values were  
286 computed as the weighted sum of all HSI values belonging to species exhibiting that trait over  
287 the sum of HSI values across all species in that community (Cormen et al., 2009). Like for  
288 FGs, monthly CWM projections were performed for every SDM and mean annual CWM trait  
289 values were derived based on the ensemble of projections (Appendices S8 and S9).

290 To explore the regional patterns of copepod traits expression, clustering was used to divide  
291 the global ocean into regions with similar mean annual projections of: CWM body size,  
292 trophic groups, feeding modes, myelination and spawning mode (Appendix S10). The spatial  
293 patterns of the twelve CWM traits values were summarized through a PCA and the scores of  
294 each grid cell along the first four components (97.9% of total variance, Appendix S10) were  
295 used to calculate an Euclidean distance matrix. Various clustering approaches were explored  
296 based on this distance matrix (Appendix S11). Ultimately, we chose to present the CWM trait  
297 patterns obtained for  $k = 4$  under Ward’s linkage based on the profiles of cluster stability  
298 metrics and because this method minimizes intra-cluster variance.

299

## 300 3. Results

### 301 3.1. Copepod FGs

302 The 343 copepod species retained were clustered based on their combinations of body size,  
303 feeding mode, trophic group, myelination, and spawning mode. Eleven copepod FGs could be  
304 derived from the functional dendrogram (Fig. 2; Appendix S4). The first dichotomy in the  
305 dendrogram occurred between non carnivorous cruise feeders (FG1, 2, 3) and all other FGs.  
306 FG1 was composed of 14 cruise-feeding herbivores of rather small sizes (median  $\pm$  IQR =  
307  $1.10 \pm 0.52$  mm). Almost all species (13 out of 14) were sac-spawning, myelinated and  
308 belonged to the *Clausocalanus* genera. FG2 was defined by small ( $0.80 \pm 0.30$  mm) cruise-  
309 feeding detritivores. The 22 species of this group were all amyelinated, sac-spawning and  
310 belonged to the Oncaeidae family. FG3 was composed of 46 detritivores spanning a broader  
311 ranges of sizes ( $2.61 \pm 1.70$  mm) than the two previous groups. Most species in FG3 were  
312 myelinated (74%) and free-spawning (80%). Cruise- and current-feeding were the two  
313 predominant feeding modes, with *Spinocalanus*, *Metridia* and *Scaphocalanus* being the  
314 dominant genera in this FG.

315 The second dichotomy in the dendrogram separated the small and large sac-spawning  
316 carnivores (FG4 and 5) from the rest. FG4 consisted of 29 rather small ( $1.22 \pm 0.70$  mm)  
317 carnivorous, sac-spawning amyelinated ambush-feeders part of the Corycaeidae family and thus  
318 belonged to either the *Corycaeus*, *Farranula* or *Vettopia* genera. FG5 was made up of 29 of  
319 larger ( $4.58 \pm 2.75$  mm) species of sac-spawning current- and cruise-feeding carnivores from  
320 the Sapphirinidae and Euchaetidae families.

321 The third dichotomy of the dendrogram separated the large and medium-sized current feeders  
322 (FG6 and 7) from the rest. FG6 was a group of 13 rather large ( $6.80 \pm 2.15$  mm) myelinated,  
323 free-spawning species that were either current-feeding herbivores (85%) or fully omnivorous  
324 (15%). The two most represented genera were *Calanus* and *Eucalanus*. FG7 was the largest  
325 FG with 55 and current-feeding herbivores spanning a rather wide size range ( $1.80 \pm 2.26$   
326 mm). Most were myelinated (95%) and free-spawning (89%). The main genera contributing  
327 to the composition of FG7 were the smaller *Calanus* (e.g., *C. helgolandicus*, *C. finmarchicus*  
328 or *C. pacificus*), and *Calocalanus* and *Paracalanus*.

329 The fourth dichotomy occurred between the small and medium-sized omnivores and the  
330 medium free spawning carnivores of FG8. FG8 consisted of 49 predominantly amyelinated  
331 (86%) and free-spawning (80%) medium-sized omnivorous-carnivorous species of various  
332 size ( $3.40 \pm 1.7$  mm). This diverse group mixed current- (60%) and ambush-feeders (40%)  
333 and gathered 12 genera with *Candacia*, *Haloptilus* and *Heterorhabdus* being the most  
334 dominant. FG9 was composed of 40 free-spawning and mostly amyelinated (72%), current-

335 feeding omnivorous species showing a body sizes range of  $2.76 \pm 1.98$  mm. *Pleuromamma*,  
336 *Gaetanus*, and *Labidocera* were the main genera.  
337 Finally, the fifth and last main dichotomy separated the mixed-feeding omnivores (FG11)  
338 from the smaller ambush feeders (FG10). FG10 was rather homogeneous and contained 14  
339 small ( $1.10 \pm 0.52$  mm) ambush-feeding, amyelinated and sac-spawning omnivores. All  
340 species belonged to either the *Oithona* or the *Dioithona* genera from the Oithonidae family.  
341 FG11 was a group of 32 amyelinated, free-spawning, current-ambush feeding species  
342 predominantly belonging to the *Acartia* (omnivorous-herbivorous) and *Centropages*  
343 (omnivorous) genera. All species in FG11 were rather small ( $1.50 \pm 0.67$  mm).  
344

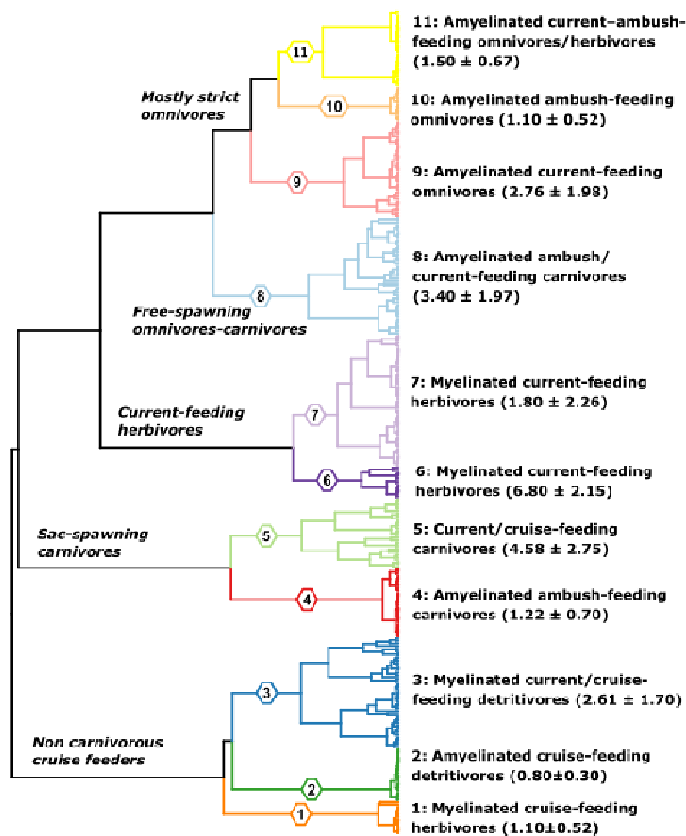

345  
346 *Figure 2:* Functional dendrogram representing the inter-species traits dissimilarity for 343  
347 copepod species. The hierarchical clustering was performed on a Euclidean distance matrix  
348 issued from the species coordinates ensuing from a Factor Analysis of Mixed Data (FAMD).  
349 Each leaf of the functional dendrogram represents a copepod species and the eleven  
350 functional groups (FGs) are numbered and highlighted in color. The range (median  $\pm$  IQR) of  
351 the mean maximum body size of each FG is given in brackets.

352

353 The functional space defined by the PCs of the FAMD describes the reduced functional space  
354 (Appendix S12). The first four PC of the FAMD explained 79.21% of the total variance in

355 functional traits. The largest functional distance along the first component was found between  
356 FG4 and FG6.

357

### 358 3.2. FGs in environmental niche space

359 The univariate niche centers and widths of the copepod species modelled were used to  
360 position FGs in niche space (Fig. 3; Appendix S13). The main niche characteristics that  
361 contributed the most positively to PC1 (relative contribution to PC1 given in brackets) were:  
362 logChl center (12.16%), logChl width (12.51%), EKE width (11.78%), MLD center (9.96%),  
363 and MLD width (10.78%). The most important niche characteristics scoring PC2 were: Si\*  
364 center (30.88%), Si\* width (27.90%) and SST center (11.17%). Species with positive PC1  
365 scores were those affiliated with wider niches and conditions of higher concentrations of  
366 nutrients and chlorophyll-a, stronger seasonal variations, and overall higher water column  
367 turbulence and mixing.

368

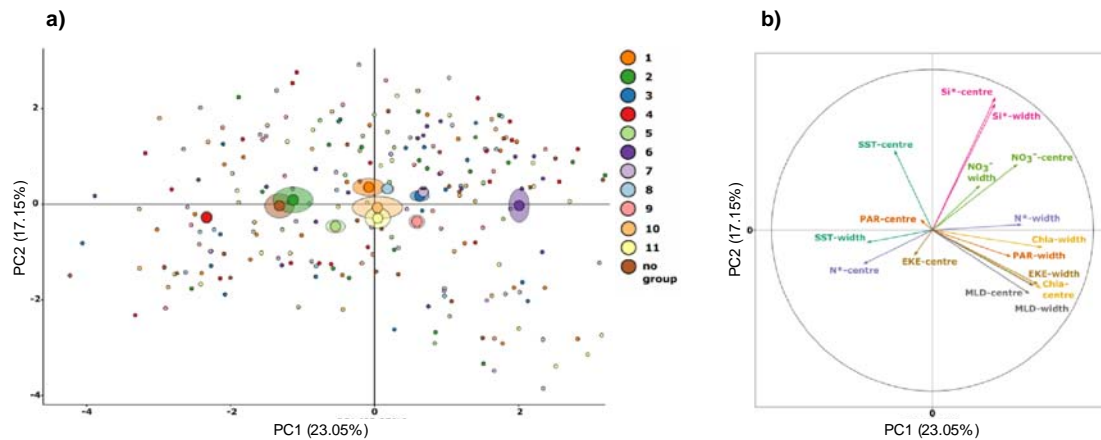

369

370 **Figure 3:** Position of a) functional groups (FGs, larger circles) and species (smaller circles) in  
371 environmental niche space according to the first two principal components (PCs) of a  
372 principal component analysis (PCA) performed on b) the species-level niche characteristics  
373 derived from GAM-based univariate response curves. The semi-transparent ellipses indicate  
374 two times the value of the standard errors associated with the mean PC scores of the FGs.

375

376 Post-hoc variance analyses showed significant (Dunn's tests;  $p < 0.05$ ) inter-FGs variations in  
377 niche characteristics and PC scores (Appendix S14). The largest distance in niche space (PC1)  
378 was found between FG4 and FG6 (Fig. 3a;  $p = 6.5e-10$ ). Along PC1, FG4 also differed  
379 significantly from FG1 ( $p = 0.042$ ), FG3 ( $p = 1.6e-06$ ), FG7 ( $p = 1.3e-08$ ), FG8 ( $p = 1.4e-4$ ),  
380 FG9 ( $p = 2.3e-06$ ), FG10 ( $p = 0.011$ ) and FG11 ( $p = 0.005$ ). Conversely, FG6 differed  
381 significantly from FG2 ( $p = 4.5e-4$ ), FG5 ( $p = 0.001$ ) and FG8 ( $p = 0.049$ ) along PC1. FG6

382 also differed significantly from FG2 ( $p = 0.001$ ) and FG5 ( $p = 0.002$ ). None of the FGs  
383 showed significant variations along PC2. Only FG3 and FG7 showed significant variations  
384 along PC3 ( $p = 4.2e-3$ ; Appendices S13 and S14). To summarize, when FGs 4 and 6 were not  
385 accounted for, none of the remaining nine FGs showed significant variations in PC1 and PC2  
386 scores (all  $p > 0.05$ ).

387

### 388 3.3. Mean annual habitat suitability indices (HSI) patterns

389 For all three SDMs and 11 FGs combined, we found SST to be the most important predictor,  
390 followed by PAR, logNO<sub>3</sub>, MLD, logChl, logEKE, Si\*, N\*, Wind, and pCO<sub>2</sub> (Appendix S6).  
391 Thus, most FGs displayed mean annual HSI patterns that were driven by the latitudinal  
392 temperature gradient at the first-order (Fig. 4).

393

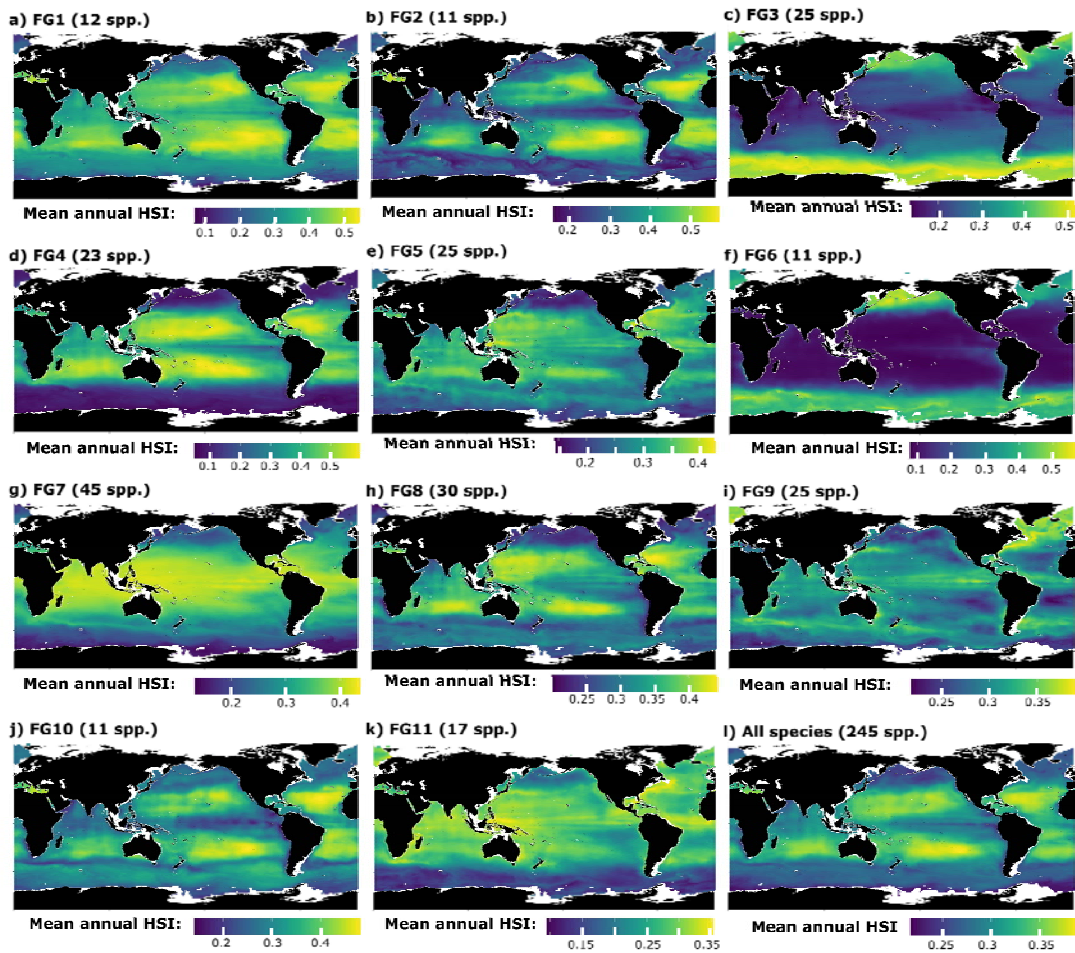

394

395 **Figure 4:** Mean annual habitat suitability index (HSI) of the eleven copepod functional groups (FG)  
396 for the global surface ocean (Mercator projection): a) FG1 (myelinated cruise-feeding omnivores-  
397 herbivores), b) FG2 (amyelinated cruise-feeding detritivores), c) FG3 (myelinated mixed-feeding or  
398 cruise-feeding detritivores), d) FG4 (amyelinated ambush-feeding carnivores), e) FG5 (current- or

399 cruise-feeding carnivores), f) FG6 (myelinated current-feeding omnivores-herbivores), g) FG7  
400 (myelinated current-feeding omnivores-herbivores), h) FG8 (amyelinated ambush- or current-feeding  
401 carnivores), i) FG9 (amyelinated current-feeding omnivores), j) FG10 (amyelinated ambush-feeding  
402 omnivores), k) FG11 (amyelinated mixed-feeding omnivores) and for l) all species together. Mean  
403 annual estimates were derived from the 12 monthly estimates of mean HSI obtained for three species  
404 distribution models (SDMs).

405  
406 The mean annual HSI of FG3 was found to decrease progressively from the poles towards the  
407 equator. In contrast, the mean annual HSI of FG1, FG2, FG4, FG7, FG8, and FG10 were  
408 found to be highest in the tropics and decreased towards higher latitudes. For those five FGs,  
409 slighter decreases in HSI were modelled towards the tropical upwelling systems (e.g., Peru,  
410 Benguela), the northern part of the Indian Ocean and the Pacific Equatorial counter current.  
411 Therefore, these five FGs reached maximal HSI in the oligotrophic conditions of the tropical  
412 gyres. Meanwhile, FG5, FG9, and FG11 show less marked latitudinal gradients in mean  
413 annual HSI values, but they all displayed lower HSI in higher latitudes than in the tropics.

414

#### 415 3.4. Functional trait biogeography from CMW trait values and regionalization

416 We identified four ocean regions that displayed significant contrasts in CWM trait proportions  
417 and that overlap with major oceanographic features (Fig. 5; Appendix S15).

418

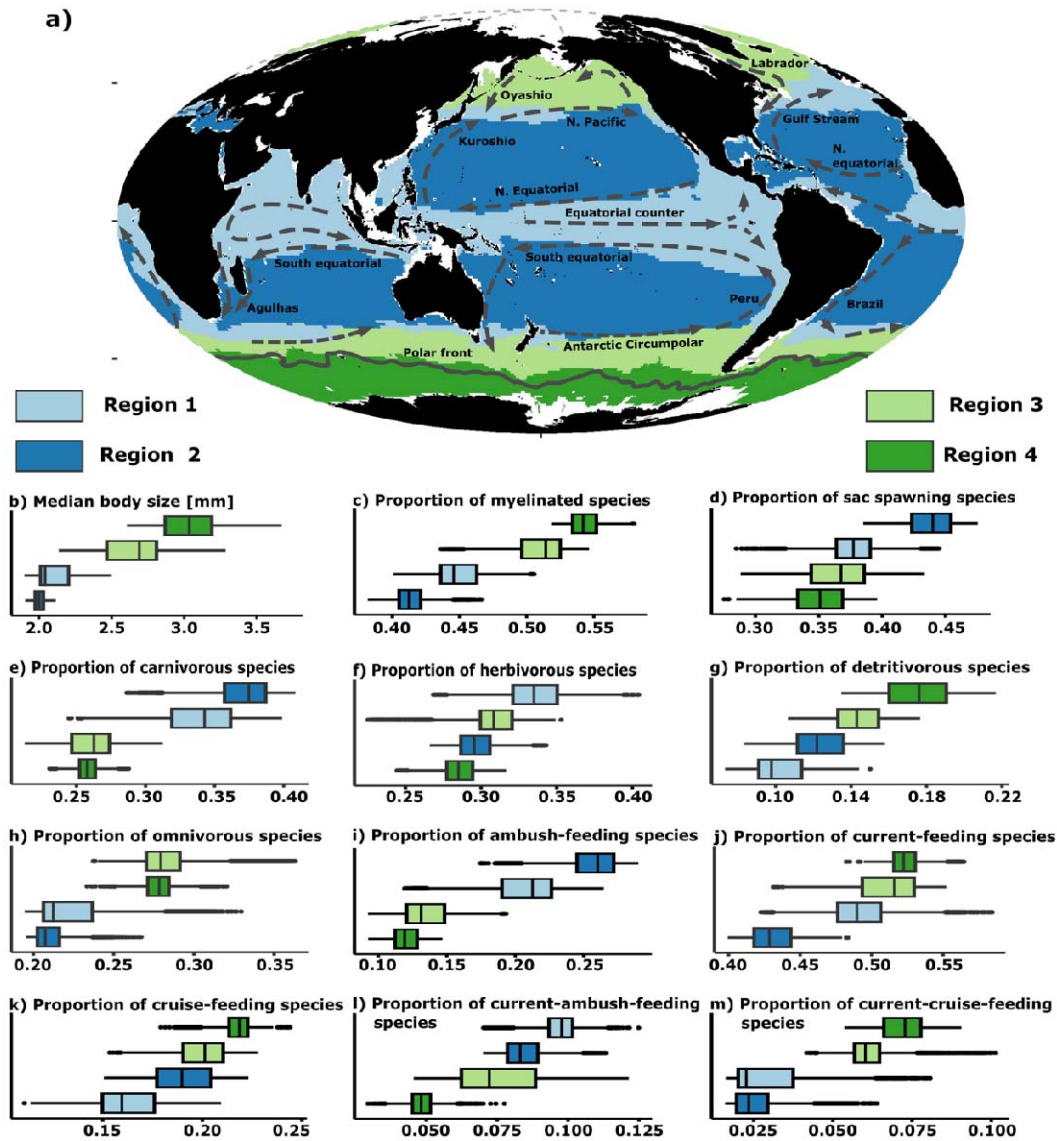

419

420 **Figure 5:** Partitioning of the global surface ocean into a) four regions according to the principal  
 421 components of a Principal Component Analysis (PCA) based on the CWM trait values (Mollweide  
 422 projection). Major oceanographic circulation features were overlaid to highlight their overlap  
 423 between the regions' boundaries. The distribution of CWM trait values between the four regions are  
 424 shown through the boxplots: b) median body size, CWM values of c) myelinated species, d) sac  
 425 spawning species, e) carnivores, f) herbivores, g) detritivores, h) omnivores, i) ambush-feeders, j)  
 426 current-feeders, k) cruise-feeders, l) current-ambush-feeders, and m) current-cruise-feeders. The  
 427 lower, middle, and upper boundaries of the boxplots correspond to the 25th, 50th, and 75th percentiles  
 428 respectively. The lower and upper whiskers extend no further than 1.5\*IQR (interquartile range) from  
 429 the lower and upper hinges.

430

431 Region 1 fell within the equatorial band and comprised coastal upwelling regions and the  
 432 main oxygen minimum zones. The copepod communities of Region 1 displayed lower CWM  
 433 body size (median  $\pm$  IQR = 2.043 mm  $\pm$  0.194), higher proportions of carnivores (0.342  $\pm$



434 0.040) and herbivores ( $0.335 \pm 0.029$ ) but lower proportions of omnivores ( $0.213 \pm 0.030$ )  
435 and detritivores ( $0.098 \pm 0.023$ ). The CWM values of myelinated ( $0.446 \pm 0.026$ ), sac-  
436 spawning ( $0.377 \pm 0.026$ ), and ambush-feeding ( $0.212 \pm 0.036$ ) were lower than in Region 2  
437 and higher than in Regions 3 and 4 (Appendix S13).

438 Region 2 comprised the tropical gyres. We found that communities in Region 2 showed the  
439 lowest CW median body size ( $2.002 \pm 0.057$  mm) but the highest CWM values of ambush-  
440 feeding ( $0.259 \pm 0.027$ ) carnivorous ( $0.372 \pm 0.028$ ), and sac-spawning ( $0.440 \pm 0.030$ )  
441 copepods. Conversely, the CWM values of myelinated ( $0.413 \pm 0.016$ ) species in Region 2  
442 were the lowest across all four regions.

443 Region 3 was located poleward to the previous two regions and covered the North Atlantic,  
444 the North Pacific and the waters located between the Polar Front and the Antarctic  
445 Circumpolar Current. The CWM body size ( $2.691 \pm 0.342$  mm), the CWM values of  
446 myelinated ( $0.514 \pm 0.028$ ) and omnivorous ( $0.279 \pm 0.021$ ) species were higher there than in  
447 Regions 1 and 2. In contrast, the CWM values of sac-spawners ( $0.368 \pm 0.041$ ), carnivores  
448 ( $0.266 \pm 0.026$ ), and ambush feeders ( $0.132 \pm 0.027$ ) were lower.

449 Region 4 mainly corresponded to the Southern Ocean (i.e., grid cells south of the Antarctic  
450 Polar Front, Fig. 5a). Region 4 displayed the highest CWM body size ( $3.035 \pm 0.321$  mm),  
451 higher CWM values of myelinated ( $0.541 \pm 0.018$ ), omnivorous ( $0.278 \pm 0.013$ ), and  
452 detritivorous ( $0.176 \pm 0.030$ ) species, and the lowest CWM values of sac-spawners ( $0.351 \pm$   
453  $0.035$ ). The CWM values of current-feeding ( $0.522 \pm 0.015$ ) and cruise-feeding ( $0.218 \pm$   
454  $0.009$ ) species were higher than those of ambush-feeding ( $0.120 \pm 0.016$ ).

455

## 456 **4. Discussion**

### 457 4.1. Towards meaningful global copepod FGs in marine ecology and ecosystem modelling

458 We identified eleven copepod FGs based on combinations of species-level functional traits.  
459 Nine of these eleven FGs had also been found, or were nested within larger groups, in  
460 previous studies based on regional species pools (Table 1), which suggests that most of the  
461 functions performed by copepods on regional scales can also be found in the upper hundreds  
462 of meters of the global ocean.

463

464 **Table 1:** Comparison of the copepod functional groups (FGs) defined in the present study and those  
465 found in previous studies based on species and functional trait composition. The range (median  $\pm$  IQR)  
466 of the species body size is given in brackets for our FGs. List of acronyms describing the functional  
467 traits: *Sma* = Small; *Lar* = Large; *Mye* = Myelinated; *Amye* = Amyelinated; *Sac* = Sac-spawning; *Cru*

468 = Cruise-feeding; *Cur* = Current-feeding; *Amb* = Ambush-feeding; *Mix* = Mixed-feeding; *Omni* =  
 469 Omnivores; *Herb* = Herbivores; *Carn* = Carnivores; *Detr* = Detritivores.

| This study | Main clade                                                   | Group composition                   | Pomerleau et al. (2015) - North Pacific Ocean | Benedetti et al. (2016) - Mediterranean Sea | Benedetti et al. (2018) - Mediterranean Sea | Becker et al. South Atlantic          |
|------------|--------------------------------------------------------------|-------------------------------------|-----------------------------------------------|---------------------------------------------|---------------------------------------------|---------------------------------------|
| FG1        | <i>Clausocalanus</i>                                         | Mye, Cru, Omni-Herb (1.10 ± 0.52)   | Sma, Cur+Cru, Omni-Herb (Group 6)             | Sma, Cru, Omni-Herb (subset of Group 6)     | Sma, Cru, Omni-Herb (Group 7)               | Sma+Lar, Cru+Cru, Omn (subset of Gr   |
| FG2        | <i>Oncaeidae</i>                                             | Amye, Cru, Detr (0.80 ± 0.30)       | No equivalent                                 | Sma, Cru, Omni-Detr (subset of Group 6)     | Sma, Sac, Detr (subset of Group 5)          | Sma, Amye, Cru, Carn o (subset of Gr  |
| FG3        | <i>Spinocalanus</i> , <i>Scaphocalanus</i> , <i>Metridia</i> | Mye, Mix or Cru, Detr (2.61 ± 1.70) | No equivalent                                 | Sma, Cru, Omni-Detr (subset of Group 6)     | Sma, Sac, Detr (subset of Group 5)          | No equiva                             |
| FG4        | <i>Corycaeidae</i>                                           | Amye, Amb, Carn (1.22 ± 0.70)       | No equivalent                                 | Sma, Amb, Carn (Group 2)                    | Sma, Amb, Carn (Group 2)                    | Sma, Amye, Cru, Carn o (subset of Gr  |
| FG5        | <i>Sapphirinidae</i> , <i>Euchaetidae</i>                    | Cur or Cru, Carn (4.58 ± 2.75)      | No equivalent                                 | Lar, Cru, Carn (Group 1)                    | Lar, Cru or Cur, Carn (Group 1)             | Sma+Lar, Mye, Cur, Omni (subset of Gr |
| FG6        | <i>Calanus</i> , <i>Eucalanus</i>                            | Mye, Cur, Omni-Herb (6.80 ± 2.15)   | No equivalent                                 | No equivalent                               | No equivalent                               | No equiva                             |
| FG7        | <i>Calanus</i> , <i>Paracalanus</i> , <i>Calocalanus</i>     | Mye, Cur, Omni-Herb (1.80 ± 2.26)   | Sma+Lar, Cur, Omni-Herb (Group 5c)            | Sma+Lar, Cur, Omni-Herb (Group 4)           | Sma+Lar, Cur, Omni-Herb (Groups 3 and 4)    | Lar, Mye, Omni-Herb (s Group 4)       |
| FG8        | <i>Candacia</i> , <i>Haloptilus</i> , <i>Heterorhabdus</i>   | Amy, Amb or Cur, Carn (3.40 ± 1.97) | No equivalent                                 | Lar, Cru, Carn (Group 1)                    | Lar, Cru or Cur, Carn (Group 1)             | No equiva                             |
| FG9        | <i>Pleuromamma</i> , <i>Gaetanus</i> , <i>Labidocera</i>     | Amy, Cur, Omni (2.76 ± 1.98)        | No equivalent                                 | Sma+Lar, Cur, Omni-Herb (subset of Group 4) | Sma+Lar, Cur, Omni-Herb (subset of Group 4) | No equiva                             |
| FG10       | <i>Oithonidae</i>                                            | Amy, Amb, Omni (1.10 ± 0.52)        | No equivalent                                 | Sma, Amb, Omni (Group 5)                    | Sma, Amb, Omni (Group 6)                    | Sma, Amye, Amb, Omni (A)              |
| FG11       | <i>Acartia</i> , <i>Centropages</i>                          | Amy, Mix, Omni (1.50 ± 0.67)        | Sma, Amb, Omni (subset of Group 4)            | Sma, Mix, Omni (Group 3)                    | Sma, Mix, Omni (subset of Group 4)          | Sma, Amye, Amb, Omni (A)              |

470

471 Only the new FG3 and FG6 have no counterparts in previous studies. Their most suitable  
 472 habitats lie towards the poles (Fig. 4), whose copepod communities were not covered by the  
 473 regional studies mentioned. The copepods of FG3 (*Spinocalanus* spp., *Metridia* spp., or  
 474 *Scaphocalanus* spp.) are known to mainly inhabit deeper ocean layers where they feed on  
 475 sinking particulate organic matter and zooplankton carcasses (Yamaguchi et al., 2002; Sano et  
 476 al., 2013). Therefore, this group contributes to the remineralization of organic matter and

477 marine snow at higher latitudes and/or in colder conditions. FG6 comprises the largest ( $6.80 \pm$   
478  $2.15$  mm) current-feeding omnivorous-herbivorous copepods from the Calanidae (e.g.,  
479 *Calanus hyperboreus*, *C. glacialis*, *Eucalanus bungii* or *Rhincalanus gigas*). Many of these  
480 large copepods are not present in the warm and oligotrophic conditions of the Mediterranean  
481 Sea, hence their absence in Benedetti, Gasparini, & Ayata (2016) and Benedetti, Vogt et al.  
482 (2018). FG6 is a key group for the biological carbon pump (Jónasdóttir et al., 2015; Visser et  
483 al., 2017; Steinberg & Landry, 2017), as it represents large-bodied grazers that can actively  
484 feed on microphytoplankton, perform relatively strong vertical migrations and generate large,  
485 fast sinking pellets (Stamieszkin et al., 2015; Ohman & Romagnan 2016). This is confirmed  
486 by the position of FG6 in niche space (Fig. 3) as it is affiliated with turbulent, seasonally  
487 varying conditions with higher nutrient and chlorophyll-a concentrations. The species of FG7  
488 fill similar functions but display smaller body sizes ( $1.80 \pm 2.26$ mm; e.g., *C. helgolandicus*,  
489 *C. pacificus* and the Paracalanidae), hence we expect their contribution to size-mediated  
490 functions to be lower. The ecological roles and functions of the other nine FGs have already  
491 been discussed in previous studies, and our results support the description of their ecological  
492 roles. Here, we found a larger range of FGs compared to previous studies due to three main  
493 reasons: (i) we investigated a global pool of species (hundreds of species instead of tens), (ii)  
494 we accounted for myelination as an additional trait contrary to Benedetti, Gasparini, & Ayata  
495 (2016) and Benedetti, Vogt et al. (2018), and (iii) we retained body size as a continuous trait  
496 instead of using size classes.

497 Overall, the largest differences in niche space (Appendix S14) occurred between two main  
498 sets of FGs: (i) myelinated free-spawning current-feeding herbivores of various sizes (FG3, 6,  
499 7 and 9), and (ii) amyelinated sac-spawning small-bodied, or large-bodied, cruise- and  
500 ambush-feeding detritivores and carnivores (FG2, 4 and 5). The first set is associated with  
501 conditions of stronger mixing and higher nutrient and chlorophyll-a concentrations (Appendix  
502 S14). The species in these FGs also have larger niche widths, i.e. they display broader  
503 tolerances to variations in environmental conditions. Therefore, these FGs are found more  
504 frequently in high latitude environments, or boundary current systems, where either  
505 seasonality or physical mixing lead to higher mean annual productivity (Sarmiento & Gruber,  
506 2006; Roy 2018). In contrast, the FGs of the second set display narrower niches and are  
507 associated with conditions typical of the warmer tropical oligotrophic gyres (i.e., weaker  
508 water mixing and lower nutrient and chlorophyll-a concentrations; Appendix S14).  
509 Meanwhile, the FGs that are in the center of the niche space (FG1, 8, 10 and 11) could not be

510 associated to any particular environment, likely because they include genera with a wide  
511 latitudinal distributions.

512 FGs can also combine species that are known to inhabit different vertical layers of the water  
513 column (e.g., FG9 which gathers epipelagic species with meso-bathypelagic ones). This is  
514 because depth preferences cannot be considered as a functional trait per se (Litchman et al.,  
515 2013). Rather, the depth range of a species reflects the outcome of the interactions between its  
516 traits and the abiotic and biotic conditions. Therefore, our approach likely overlooks vertical  
517 habitat partitioning that occur between or within FGs.

518 The continuum of FGs in niche space was also found in functional trait space. Indeed, the FGs  
519 of sets (i) and (ii) were often found on opposite sides of the FAMD dimensions (Appendix  
520 S12). The global distribution of the FGs and CWM trait values further support the statements  
521 above (Figs. 3 and 4): larger myelinated free-spawning and current- and cruise- feeding  
522 copepods occur more frequently near the poles, whereas smaller amyelinated sac-spawning  
523 and ambush-feeding copepods tend to occur in tropical oligotrophic gyres. Similar  
524 continuums of copepod functional traits and niches were found at regional (Table 1) to global  
525 scales (Brun et al., 2016).

526 In summary, our results support the view that planktonic copepods display a continuum of  
527 functional traits with a strong latitudinal gradient (Figs. 4 and 5; Appendix S9), driven by  
528 global gradients in abiotic conditions. Consequently, such a continuum should be explicitly  
529 represented in marine ecosystem models (e.g. similar to Serra-Pompei et al., 2020), which too  
530 often rely on a few size classes only (Le Quéré et al., 2005). These need to include FGs that  
531 are both distinct, and important in terms of their biomass. To rank the present FGs based on  
532 their contribution to total copepod community abundance in the upper ocean, we implemented  
533 a preliminary synthesis of copepod abundance observations from various data sources  
534 (Appendix S16). Examining the relative contribution of the eleven FGs to mean annual  
535 community abundance in the upper 200m (Fig. S16b) showed that three FGs emerge as the  
536 most abundant, regardless of latitude and sampling gears: FG10 (Oithonids; small ambush-  
537 feeding omnivores), FG2 (Oncaeids; small cruise-feeding detritivores) and FG1  
538 (*Clausocalanus* spp.; small cruise-feeding omnivores-herbivores). These FGs are thus likely  
539 key the development of future ecosystem models. Future work is needed to better assess the  
540 contribution of the copepod FGs to biomass and clarify their relative priorities for inclusion in  
541 ecosystem models.

542

543 4.2. Why do copepod functional traits show diverging biogeographic patterns in the ocean?

544 The largest dissimilarity in community trait expression was found between regions 2 and 4  
545 (Fig. 5b-m) and was driven by differences in CWM body size, myelination, carnivory and  
546 ambush-feeding vs. current-feeding (Appendices S9, S10 and S15). We found the boundaries  
547 of the four main regions to overlap with the trajectories of well-known boundary currents as  
548 well as equatorial counter currents and fronts (Fig. 5). Trait patterns emerge from  
549 environment-driven distribution models, so they reflect the fact that certain trait combinations  
550 are more competitive than others under varying temperature and food conditions (Barton et  
551 al., 2013; van Someren Gréve et al., 2017; McGinty et al., 2021).

552 Median copepod body size decreased from the poles to the equator with a slight increase in  
553 upwelling systems. Such a pattern is primarily driven by the strong negative relationship  
554 between the body size of marine ectotherms and temperature, according to Bergmann's rule  
555 (Brun et al., 2016; McGinty et al., 2018; Evans et al., 2020; Brandão et al., 2021; Campbell et  
556 al., 2021). The processes underlying Bergmann's rule remain debated, but it is likely that  
557 warmer temperatures (or a factor confounded with temperature) decrease growth efficiency  
558 and/or promote the maturation of adults at smaller body sizes (Atkinson 1994; Isla et al.,  
559 2008).

560 Bergmann's rule occurs at the intraspecific and interspecific levels, meaning that warming-  
561 induced decreases in median body size can emerge if clades of small species replace large-  
562 bodied ones along a latitudinal gradient. Such a turnover in size classes has been observed as  
563 well (Evans et al., 2020; Brandão et al., 2021) and is supported by our SDM projections.  
564 Indeed, functional traits that represent shifts in clade composition such as myelination,  
565 spawning strategy, carnivory or feeding modes display latitudinal gradients that are positively  
566 or negatively correlated with the body size gradient (Appendices S9 and S10). The latitudinal  
567 patterns of these functional traits likely result from changes in food availability, quality, and  
568 predation pressure (Horne et al., 2016; van Someren Gréve et al., 2017; Roy, 2018).

569 Lipid-rich myelin sheaths enable a faster conduction of nerve responses. This promotes faster  
570 reaction times and thus more efficient feeding or escape behaviors (Lenz, 2012). Myelin  
571 sheaths are cholesterol-rich so they require larger metabolic investments of dietary lipids  
572 (Lenz, 2012), which helps explain why copepod communities show larger proportion of small  
573 amyelinated taxa in tropical gyres where smaller, lipid-poor phytoplankton dominate (Roy,  
574 2018). Therefore, the proportion of myelinated species follows the same spatial pattern as  
575 body size and current-feeding (Fig. 5b,c,j,m) and peaks in productive environments  
576 characterized by larger and lipid-rich plankton (Roy 2018).

577 Similarly, sac-spawning is an energy-conservative spawning strategy, as it reduces egg-  
578 mortality at the cost of fecundity and hatching speed. The increased proportions of sac-  
579 spawners in tropical gyres (Fig. 5d) could reflect an adaptation to limited food availability  
580 (Kiørboe & Sabatini, 1994; Barton et al., 2013) and higher rates of carnivory (Fig. 5e;  
581 Woodd-Walker et al., 2002) and egg cannibalism among copepods (Ohman & Hirche, 2001;  
582 Segers & Taborsky, 2011). Ambush-feeding is a passive feeding mode that lowers predation  
583 risk and energy costs compared to current- and cruise-feeding, but at the expense of feeding  
584 efficiency (Kiørboe, 2011a; van Someren Gréve et al., 2017). Consequently, the increased  
585 proportion of ambush-feeders in region 2 (Fig. 5i) may result from trade-offs in functional  
586 traits expression driven by abiotic and biotic filtering (Litchman et al., 2013), as oligotrophic  
587 gyres seem to promote food-webs with increased carnivorous predation (Fig. 5e) and resource  
588 competition (Woodd-Walker et al., 2002; Prowe, Visser, Andersen, Chiba, & Kiørboe, 2019).  
589 Since our approach is based on presence data and habitat suitability indices rather than  
590 abundances, it likely underestimates the contribution of very abundant ambush-feeding  
591 species like *Oithona similis* at high latitudes (Pinkerton et al., 2010; Prowe et al., 2019;  
592 Becker et al., 2021). As a result, we probably underestimate the proportion of ambush-feeders  
593 in regions such as the Southern Ocean compared to Prowe et al. (2019), although these  
594 authors discarded other ambush-feeding copepods such as the Corycaeidae (Benedetti et al.,  
595 2016; Brun et al., 2017). These elements support the fact that our modelled copepods  
596 functional traits patterns emerge from interactions between environmental conditions and the  
597 relative fitness resulting from different trait combinations.

598

#### 599 4.3. Caveats and conclusion

600 Our results are sensitive to: (i) the way the species were positioned in a functional space and  
601 how the FGs were defined from the latter, (ii) the quantity and quality of the functional trait  
602 data considered, and (iii) the SDMs chosen to generate the CWM traits values. We  
603 investigated the sensitivity of our FGs to the clustering approach (Appendix S4). We assessed  
604 how using this alternative dimension reduction analysis affected the quality of the functional  
605 trait space by computing the Area Under the Curve (AUC) criterion (Mouillot et al., 2021).  
606 We found an AUC value of 0.81, which is substantially higher than the recommended 0.7  
607 threshold and indicates a “high quality trait space”. Plus, all the functional dendrograms  
608 emerging from alternative clustering approaches showed fairly similar structure (mean  
609 Baker’s Gamma correlation coefficient was  $0.75 \pm 0.12$ ), indicating that they all lead to  
610 similar FGs. The traits chosen for this study only cover a fraction of the traits mentioned in

611 the literature (Litchman et al., 2013; Appendix S3). Therefore, our study likely underestimates  
612 the true diversity of copepod functions in the ocean. More field observations and lab  
613 experiments are required to document the existing traits of many copepod species (Barton et  
614 al., 2013).

615 We found some regional differences between the mean annual HSI projections of the SDMs.  
616 The GLM estimated higher mean HSI than the two other model types in the Southern Ocean  
617 (Appendix S8). Such variability stems from how the various SDMs cope with limited  
618 predictors and species data availability in winter conditions at the very high latitudes. Here,  
619 the less complex response curves of GLMs (Merow et al., 2014) lead to higher average HSI in  
620 very cold temperatures compared to GAMs. The HSI patterns obtained from the GAMs and  
621 ANNs were closer to the latitudinal diversity gradients that were previously observed for  
622 marine ectotherms (Tittensor et al., 2010; Benedetti et al., 2021). Interestingly, inter-SDMs  
623 variability was much lower when looking at CWM traits projections rather than HSI patterns  
624 (Appendix S8). The fact that CWM body size and CWM myelination show very similar  
625 spatial patterns and ranges to the estimates of Brun et al. (2016) gives us further confidence in  
626 our spatial projections.

627 To conclude, we recommend the inclusion of multiple FGs of copepods in marine ecosystem  
628 models, based on our functional dendrogram (Fig. 2), with the level of complexity of copepod  
629 representation reflecting not only the FGs dominating community biomass at the scale of the  
630 study region(s), but also the traits of interest. Ideally, future global marine ecosystems, that  
631 cannot efficiently include 11 copepod groups, will include a few (3-4) FGs that cover the  
632 main gradients observed in trait space (Fig. 2; Appendix S12), niche space (Fig. 3),  
633 geographical space (Figs. 4, 5; Appendices S9, S10) and that represent the majority of global  
634 or regional biomass. For other ecological applications or to represent food-web interactions  
635 across trophic levels (Serra-Pompei et al., 2020), these groups could be split into further FGs  
636 with specific characteristics (e.g., size classes, high lipid content, grazing and mortality rates  
637 etc.). Future studies are required to improve the coverage of functional trait data to include  
638 other taxonomic groups and more quantitative traits (Appendix S3). Ongoing compilations of  
639 zooplankton biomass data will also help rank the regional to global importance of the present  
640 FGs, and to assess links between ecosystem function and service provision.

641

#### 642 *Data Availability Statement*

643 The copepod species occurrences data used to train the species distribution models are  
644 publicly available on Zenodo (<https://doi.org/10.5281/zenodo.5101349>). The species

645 functional traits table is available as Supplementary Appendix S2. All R codes are accessible  
646 on the GitHub account of J.W. (<https://github.com/jonas-wydlar>) and are also available on  
647 Zenodo (<https://doi.org/10.5281/zenodo.7050567>).

648

#### 649 *References*

650 Aiello-Lammens, M. E., Boria, R. A., Radosavljevic, A., Vilela, B., & Anderson, R. P. (2015).  
651 sptthin: an R package for spatial thinning of species occurrence records for use in ecological niche  
652 models. *Ecography*, 38(5), 541–545.

653 Atkinson, D. (1994). Temperature and Organism Size—A Biological Law for Ectotherms? In  
654 M. Begon & A. H. Fitter (Eds.), *Advances in Ecological Research* (Vol. 25, pp. 1-58): Academic  
655 Press.

656 Audigier, V., Husson, F., & Josse, J. (2016). A principal component method to impute missing  
657 values for mixed data. *Advances in Data Analysis and Classification*, 10(1), 5–26.

658 Barbet-Massin, M., Jiguet, F., Albert, C. H., & Thuiller, W. (2012). Selecting pseudo-absences  
659 for species distribution models: how, where and how many? *Methods in Ecology and Evolution*, 3(2),  
660 327-338.

661 Barton, A. D., Pershing, A. J., Litchman, E., Record, N. R., Edwards, K. F., Finkel, Z. V., . . .  
662 Ward, B. A. (2013). The biogeography of marine plankton traits. *Ecology Letters*, 16(4), 522–534.  
663 doi: 10.1111/ele.12063

664 Beaugrand, G., Edwards, M., & Legendre, L. (2010). Marine biodiversity, ecosystem  
665 functioning, and carbon cycles. *Proceedings of the National Academy of Sciences*, 107(22), 10120-  
666 10124. doi:10.1073/pnas.0913855107

667 Becker, É. C., Mazzocchi, M. G., de Macedo-Soares, L. C. P., Costa Brandão, M., &  
668 Santarosa Freire, A. (2021). Latitudinal gradient of copepod functional diversity in the South Atlantic  
669 Ocean. *Progress in Oceanography*, 199, 102710. doi:<https://doi.org/10.1016/j.pocean.2021.102710>

670 Benedetti, F., Gasparini, S., & Ayata, S.-D. (2016). Identifying copepod functional groups  
671 from species functional traits. *Journal of Plankton Research*, 38(1), 159-166.  
672 doi:10.1093/plankt/fbv096

673 Benedetti, F., Vogt, M., Righetti, D., Guilhaumon, F., & Ayata, S.-D. (2018). Do functional  
674 groups of planktonic copepods differ in their ecological niches? *Journal of Biogeography*, 45(3), 604–  
675 616. doi: 10.1111/jbi.13166

676 Benedetti, F., Vogt, M., Elizondo, U. H., Righetti, D., Zimmermann, N. E., & Gruber, N.  
677 (2021). Major restructuring of marine plankton assemblages under global warming. *Nature*  
678 *Communications*, 12(1), 5226. doi:10.1038/s41467-021-25385-x

679 Boyer, T.P., J. I. Antonov, O. K. Baranova, C. Coleman, H. E. Garcia, A. Grodsky, D. R.  
680 Johnson, R. A. Locarnini, A. V. Mishonov, T.D. O'Brien, C.R. Paver, J.R. Reagan, D. Seidov, I. V.



- 681 Smolyar, and M. M. Zweng, 2013: World Ocean Database 2013, NOAA Atlas NESDIS 72, S.  
682 Levitus, Ed., A. Mishonov, Technical Ed.; Silver Spring, MD, 209 pp.,  
683 <http://doi.org/10.7289/V5NZ85MT>
- 684 Brun, P., Payne, M. R., & Kiørboe, T. (2016). Trait biogeography of marine copepods—an  
685 analysis across scales. *Ecology Letters*, 19(12), 1403–1413. doi: 10.1111/ele.12688
- 686 Brun, P., Payne, M. R., & Kiørboe, T. (2017). A trait database for marine copepods. *Earth*  
687 *System Science Data*, 9(1), 99–113. doi:10.5194/essd-2016-30
- 688 Campbell, M. D., Schoeman, D. S., Venables, W., Abu-Alhajja, R., Batten, S. D., Chiba, S., . .  
689 . Richardson, A. J. (2021). Testing Bergmann's rule in marine copepods. *Ecography*, 44(9), 1283-  
690 1295. doi:<https://doi.org/10.1111/ecog.05545>
- 691 Cormen, T. H., Leiserson, C. E., Rivest, R. L., & Stein, C. (2009). Introduction to algorithms.  
692 *MIT and McGraw*.
- 693 Dormann, C. F., Elith, J., Bacher, S., Buchmann, C., Carl, G., Carré, G., . . . others (2013).  
694 Collinearity: a review of methods to deal with it and a simulation study evaluating their performance.  
695 *Ecography*, 36(1), 27–46. doi: 10.1111/j.1600-0587.2012.07348.x
- 696 Evans, L. E., Hirst, A. G., Kratina, P., & Beaugrand, G. (2020). Temperature-mediated  
697 changes in zooplankton body size: large scale temporal and spatial analysis. *Ecography*, 43(4), 581-  
698 590. doi:<https://doi.org/10.1111/ecog.04631>
- 699 Flynn, K. J., St John, M., Raven, J. A., Skibinski, D. O. F., Allen, J. I., Mitra, A., & Hofmann,  
700 E. E. (2015). Acclimation, adaptation, traits and trade-offs in plankton functional type models:  
701 reconciling terminology for biology and modelling. *Journal of Plankton Research*, 37(4), 683-691.  
702 doi:10.1093/plankt/fbv036
- 703 Guisan, A., Thuiller, W., & Zimmermann, N. E. (2017). Habitat suitability and distribution  
704 models: with applications in R. Cambridge University Press.
- 705 Hansen, B., Bjørnsen, P. K., & Hansen, P. J. (1994). The size ratio between planktonic  
706 predators and their prey. *Limnology & Oceanography*, 39(2), 395–403.
- 707 Hébert, M.-P., Beisner, B. E., & Maranger, R. (2017). Linking zooplankton communities to  
708 ecosystem functioning: toward an effect-trait framework. *Journal of Plankton Research*, 39(1), 3–12.  
709 doi:10.1093/plankt/fbw068
- 710 Hijmans, R. J. (2012). Cross-validation of species distribution models: removing spatial  
711 sorting bias and calibration with a null model. *Ecology*, 93(3), 679-688.  
712 doi:<https://doi.org/10.1890/11-0826.1>
- 713 Hofmann Elizondo, U., Righetti, D., Benedetti, F., & Vogt, M. (2021). Biome partitioning of  
714 the global ocean based on phytoplankton biogeography. *Progress in Oceanography*, 194, 102530.  
715 doi:<https://doi.org/10.1016/j.pocean.2021.102530>

- 716 Horne, C. R., Hirst, A. G., Atkinson, D., Neves, A., & Kiørboe, T. (2016). A global synthesis  
717 of seasonal temperature– size responses in copepods. *Global Ecology and Biogeography*, 25(8), 988–  
718 999. doi: 10.1111/geb.12460
- 719 Huys, R. & Boxshall, G.A. (1991). *Copepod Evolution*. London, UK: Ray Society  
720 (Publications), 159. ISBN 0-903-87421-0. 468 pp.
- 721 Isla, J. A., Lengfellner, K., & Sommer, U. (2008). Physiological response of the copepod  
722 *Pseudocalanus* sp. in the Baltic Sea at different thermal scenarios. *Global Change Biology*, 14(4),  
723 895-906. doi:<https://doi.org/10.1111/j.1365-2486.2008.01531.x>
- 724 Jónasdóttir, S. H., Visser, A. W., Richardson, K., & Heath, M. R. (2015). Seasonal copepod  
725 lipid pump promotes carbon sequestration in the deep North Atlantic. *Proceedings of the National*  
726 *Academy of Sciences*, 112(39), 12122-12126. doi:10.1073/pnas.1512110112
- 727 Kenitz, K. M., Visser, A. W., Mariani, P., & Andersen, K. H. (2017). Seasonal succession in  
728 zooplankton feeding traits reveals trophic trait coupling. *Limnology & Oceanography*, 62(3), 1184–  
729 1197.
- 730 Kiørboe, T. (2011a). What makes pelagic copepods so successful? *Journal of Plankton*  
731 *Research*, 33(5), 677– 685. doi:10.1093/plankt/fbq159
- 732 Kiørboe, T. (2011b). How zooplankton feed: mechanisms, traits and trade-offs. *Biological*  
733 *Reviews*, 86(2), 311– 339. doi: 10.1111/j.1469-185X.2010.00148.x
- 734 Kiørboe, T., & Hirst, A. G. (2014). Shifts in mass scaling of respiration, feeding, and growth  
735 rates across life-form transitions in marine pelagic organisms. *The American Naturalist*, 183(4), E118–  
736 E130.
- 737 Kiørboe, T., & Sabatini, M. (1994). Reproductive and life cycle strategies in egg-carrying  
738 cyclopid and free-spawning calanoid copepods. *Journal of Plankton Research*, 16(10), 1353–1366.
- 739 Legendre, P., & Legendre, L. (2012). *Numerical Ecology*. Elsevier.
- 740 Le Quéré, C., Harrison, S. P., Colin Prentice, I., Buitenhuis, E. T., Aumont, O., Bopp, L., . . .  
741 others (2005). Ecosystem dynamics based on plankton functional types for global ocean  
742 biogeochemistry models. *Global Change Biology*, 11(11), 2016–2040. doi: 10.1111/j.1365-  
743 2486.2005.01004.x
- 744 Le Quéré, C., Buitenhuis, E. T., Moriarty, R., Alvain, S., Aumont, O., Bopp, L., . . . Vallina,  
745 S. M. (2016). Role of zooplankton dynamics for Southern Ocean phytoplankton biomass and global  
746 biogeochemical cycles. *Biogeosciences*, 13(14), 4111-4133. doi:10.5194/bg-13-4111-2016
- 747 Lenz, P. H. (2012). The biogeography and ecology of myelin in marine copepods. *Journal of*  
748 *Plankton Research*, 34(7), 575–589. doi:10.1093/plankt/fbs037
- 749 Litchman, E., Ohman, M. D., & Kiørboe, T. (2013). Trait-based approaches to zooplankton  
750 communities. *Journal of Plankton Research*, 35(3), 473–484. doi:10.1093/plankt/fbt019
- 751 Longhurst, A. R. (2010). *Ecological geography of the sea*. Elsevier.

- 752 McGinty, N., Barton, A. D., Record, N. R., Finkel, Z. V., & Irwin, A. J. (2018). Traits  
753 structure copepod niches in the North Atlantic and Southern Ocean. *Marine Ecology Progress Series*,  
754 601, 109-126. <https://doi.org/10.3354/meps12660>
- 755 McGinty, N., Barton, A. D., Record, N. R., Finkel, Z. V., Johns, D. G., Stock, C. A., & Irwin,  
756 A. J. (2021). Anthropogenic climate change impacts on copepod trait biogeography. *Global Change*  
757 *Biology*, 27(7), 1431-1442. doi:<https://doi.org/10.1111/gcb.15499>
- 758 Merow, C., Smith, M. J., Edwards Jr, T. C., Guisan, A., McMahon, S. M., Normand, S., . . .  
759 Elith, J. (2014). What do we gain from simplicity versus complexity in species distribution models?  
760 *Ecography*, 37(12), 1267–1281. doi: 10.1111/ecog.00845
- 761 Mouillot, D., Loiseau, N., Grenié, M., Algar, A. C., Allegra, M., Cadotte, M. W., . . . Auber,  
762 A. (2021). The dimensionality and structure of species trait spaces. *Ecology Letters*, 24(9), 1988-2009.  
763 doi:<https://doi.org/10.1111/ele.13778>
- 764 Ohman, M. D., & Hirche, H. J. (2001). Density-dependent mortality in an oceanic copepod  
765 population. *Nature*, 412(6847), 638-641. doi:10.1038/35088068
- 766 Ohman, M. D., & Romagnan, J.-B. (2016). Nonlinear effects of body size and optical  
767 attenuation on diel vertical migration by zooplankton. *Limnology & Oceanography*, 61(2), 765–770.  
768 doi: 10.1002/lno.10251
- 769 Pagès, J. (2004). Analyse factorielle de données mixtes: principe et exemple d'application.  
770 Montpellier SupAgro, <http://www.agro-montpellier.fr/sfds/CD/textes/pages1.pdf>
- 771 Phillips, S. J., Dudík, M., Elith, J., Graham, C. H., Lehmann, A., Leathwick, J., & Ferrier, S.  
772 (2009). Sample selection bias and presence-only distribution models: implications for background and  
773 pseudo-absence data. *Ecological Applications*, 19(1), 181–197.
- 774 Pinkerton, M. H., Smith, A. N. H., Raymond, B., Hosie, G. W., Sharp, B., Leathwick, J. R., &  
775 Bradford-Grieve, J. M. (2010). Spatial and seasonal distribution of adult *Oithona similis* in the  
776 Southern Ocean: Predictions using boosted regression trees. *Deep Sea Research Part I:*  
777 *Oceanographic Research Papers*, 57(4), 469-485. doi:<https://doi.org/10.1016/j.dsr.2009.12.010>
- 778 Pomerleau, C., Sastri, A. R., & Beisner, B. E. (2015). Evaluation of functional trait diversity  
779 for marine zooplankton communities in the northeast subarctic pacific ocean. *Journal of Plankton*  
780 *Research*, 37(4), 712–726. doi:10.1093/plankt/fbv045
- 781 Prowe, A. E. F., Pahlow, M., Dutkiewicz, S., Follows, M., & Oschlies, A. (2012). Top-down  
782 control of marine phytoplankton diversity in a global ecosystem model. *Progress in Oceanography*,  
783 101(1), 1-13. doi:<https://doi.org/10.1016/j.pocean.2011.11.016>
- 784 Prowe, A. E. F., Visser, A. W., Andersen, K. H., Chiba, S., & Kiørboe, T. (2019).  
785 Biogeography of zooplankton feeding strategy. *Limnology & Oceanography*, 64(2), 661–678. doi:  
786 10.1002/lno.11067

- 787 Razouls C., Desreumaux N., Kouwenberg J., & de Bovée F. (2005-2022). Biodiversity of  
788 Marine Planktonic Copepods (morphology, geographical distribution and biological data). Sorbonne  
789 University, CNRS. Available at <http://copepodes.obs-banyuls.fr/en>
- 790 Reygondeau, G., Guieu, C., Benedetti, F., Irisson, J.-O., Ayata, S.-D., Gasparini, S., &  
791 Koubbi, P. (2017). Biogeochemical regions of the Mediterranean Sea: An objective multidimensional  
792 and multivariate environmental approach. *Progress in Oceanography*, 151, 138-148.  
793 doi:<https://doi.org/10.1016/j.pocean.2016.11.001>
- 794 Ricotta, C. (2005). A note on functional diversity measures. *Basic and Applied Ecology*, 6(5),  
795 479–486.
- 796 Righetti, D., Vogt, M., Gruber, N., Psomas, A., & Zimmermann, N. E. (2019). Global pattern  
797 of phytoplankton diversity driven by temperature and environmental variability. *Science Advances*,  
798 5(5), eaau6253. doi:10.1126/sciadv.aau6253
- 799 Roy, S. (2018). Distributions of phytoplankton carbohydrate, protein and lipid in the world  
800 oceans from satellite ocean colour. *The ISME Journal*, 12(6), 1457-1472. doi:10.1038/s41396-018-  
801 0054-8
- 802 Sailley, S., Vogt, M., Doney, S., Aita, M., Bopp, L., Buitenhuis, E., ... Yamanaka, Y. (2013).  
803 Comparing food web structures and dynamics across a suite of global marine ecosystem models.  
804 *Ecological Modelling*, 261, 43–57.
- 805 Sano, M., Maki, K., Nishibe, Y., Nagata, T., & Nishida, S. (2013). Feeding habits of  
806 mesopelagic copepods in Sagami Bay: Insights from integrative analysis. *Progress in Oceanography*,  
807 110, 11-26. doi:<https://doi.org/10.1016/j.pocean.2013.01.004>
- 808 Sarmiento, J. L. & Gruber, N. (2006), *Ocean Biogeochemical Dynamics*, Princeton Univ.  
809 Press, Princeton, N. J.
- 810 Segers, F. H. I. D., & Taborsky, B. (2011). Egg size and food abundance interactively affect  
811 juvenile growth and behaviour. *Functional Ecology*, 25(1), 166-176.  
812 doi:<https://doi.org/10.1111/j.1365-2435.2010.01790.x>
- 813 Serra-Pompei, C., Soudijn, F., Visser, A. W., Kiørboe, T., & Andersen, K. H. (2020). A  
814 general size- and trait-based model of plankton communities. *Progress in Oceanography*, 189,  
815 102473. doi:<https://doi.org/10.1016/j.pocean.2020.102473>
- 816 Stamieszkin, K., Pershing, A. J., Record, N. R., Pilskañ, C. H., Dam, H. G., & Feinberg, L. R.  
817 (2015). Size as the master trait in modeled copepod fecal pellet carbon flux. *Limnology &*  
818 *Oceanography*, 60(6), 2090–2107. doi: 10.1002/lno.10156
- 819 Steinberg, D. K., & Landry, M. R. (2017). Zooplankton and the ocean carbon cycle. *Annual*  
820 *Review of Marine Science*, 9, 413–444. doi: 10.1146/annurev-marine-010814-015924
- 821 Stocker, T. (2014). Climate change 2013: the physical science basis: Working group I  
822 contribution to the fifth assessment report of the intergovernmental panel on climate change.  
823 Cambridge University Press.

824 Thuiller, W., Georges, D., Engler, R., Georges, M. D., & Breiner F. (2020). biomod2:  
825 Ensemble Platform for Species Distribution Modeling. R package version 3.4.6. [https://CRAN.R-](https://CRAN.R-project.org/package=biomod2)  
826 [project.org/package=biomod2](https://CRAN.R-project.org/package=biomod2)

827 Tittensor, D. P., Mora, C., Jetz, W., Lotze, H. K., Ricard, D., Berghe, E. V., & Worm, B.  
828 (2010). Global patterns and predictors of marine biodiversity across taxa. *Nature*, 466(7310), 1098-  
829 1101. doi:10.1038/nature09329

830 Turner, J. T. (2015). Zooplankton fecal pellets, marine snow, phytodetritus and the ocean's  
831 biological pump. *Progress in Oceanography*, 130, 205–248.  
832 <http://dx.doi.org/10.1016/j.pocean.2014.08.005>

833 Vallina, S. M., Follows, M. J., Dutkiewicz, S., Montoya, J. M., Cermeno, P., & Loreau, M.  
834 (2014). Global relationship between phytoplankton diversity and productivity in the ocean. *Nature*  
835 *Communications*, 5(1), 4299. doi:10.1038/ncomms5299

836 van Someren Gréve, H., Almeda, R., & Kiørboe, T. (2017). Motile behavior and predation risk  
837 in planktonic copepods. *Limnology & Oceanography*, 62(5), 1810– 1824. doi: 10.1002/lno.10535

838 Veloz, S. D. (2009). Spatially autocorrelated sampling falsely inflates measures of accuracy  
839 for presence-only niche models. *Journal of Biogeography*, 36(12), 2290–2299.

840 Villéger, S., Mason, N. W., & Mouillot, D. (2008). New multidimensional functional diversity  
841 indices for a multifaceted framework in functional ecology. *Ecology*, 89(8), 2290-2301.

842 Violle, C., Navas, M.-L., Vile, D., Kazakou, E., Fortunel, C., Hummel, I., & Garnier, E.  
843 (2007). Let the concept of trait be functional! *Oikos*, 116(5), 882–892. doi: 10.1111/j.2007.0030-  
844 1299.15559.x

845 Visser, A. W., Grønning, J., & Jónasdóttir, S. H. (2017). *Calanus hyperboreus* and the lipid  
846 pump. *Limnology & Oceanography*, 62(3), 1155-1165. doi:10.1002/lno.10492

847 Woodd-Walker, R. S., Ward, P., & Clarke, A. (2002). Large-scale patterns in diversity and  
848 community structure of surface water copepods from the Atlantic ocean. *Marine Ecology Progress*  
849 *Series*, 236, 189–203.

850 Yamaguchi, A., Watanabe, Y., Ishida, H., Harimoto, T., Furusawa, K., Suzuki, S., . . . Mac  
851 Takahashi, M. (2002). Community and trophic structures of pelagic copepods down to greater depths  
852 in the western subarctic Pacific (WEST-COSMIC). *Deep Sea Research Part I: Oceanographic*  
853 *Research Papers*, 49(6), 1007-1025.

854

855 *Biosketch*

856 **Fabio Benedetti** is a postdoctoral researcher and **Meike Vogt** a senior research scientist in  
857 the Environmental Physics (UP) group of ETH Zürich. Both share broad interests in plankton  
858 biogeography and functional diversity and their links with biodiversity, ecosystem function  
859 and biogeochemical cycles in the global ocean. F.B. is a macroecologist specialized in trait-

860 based approaches and plankton diversity modelling. M.V. is a marine ecosystem modeler  
861 specialized plankton functional types. **Jonas Wydler** has successfully completed his MSc  
862 degree in Environmental System Sciences at ETH Zürich, under the supervision of F.B. and  
863 M.V., which is the subject of this work.  
864 F.B. and M.V. co-designed the study and F.B. collated the data used in the analyses and  
865 provided expertise with regard to every methodology used. J.W. conducted the numerical  
866 analyses and wrote the first version of the manuscript under the supervision of F.B. and M.V.  
867 F.B. wrote the final version of the manuscript with input from both M.V. and J.W.
